# Supplementary material for: Enhanced up-conversion luminescence and temperature-sensing of GdVO4:Ln3+ with dual-wavelength excitation
Source: Royal Society of Chemistry journal article supplement (doi:10.1039/d0dt04159a), 2021-01-01
Supplement: d0dt04159a1.pdf [file d0dt04159a1.pdf]

**Enhanced Up-conversion luminescence and Temperature-sensing of  
GdVO<sub>4</sub>:Ln<sup>3+</sup> with dual-wavelength excitation**

**Yue Li, Linna Guo\*, Bowen Yang**

College of Chemistry, Zhengzhou University, Green Catalysis Center, and  
College of Chemistry, Zhengzhou University Zhengzhou, Henan 450001, China

\*Corresponding author.

E-mail address: Linna Guo, [guolinna@zzu.edu.cn](mailto:guolinna@zzu.edu.cn);

Tel.: +86-371-67766660 (Office)

Fax.: +86-371-67766667 (Office)

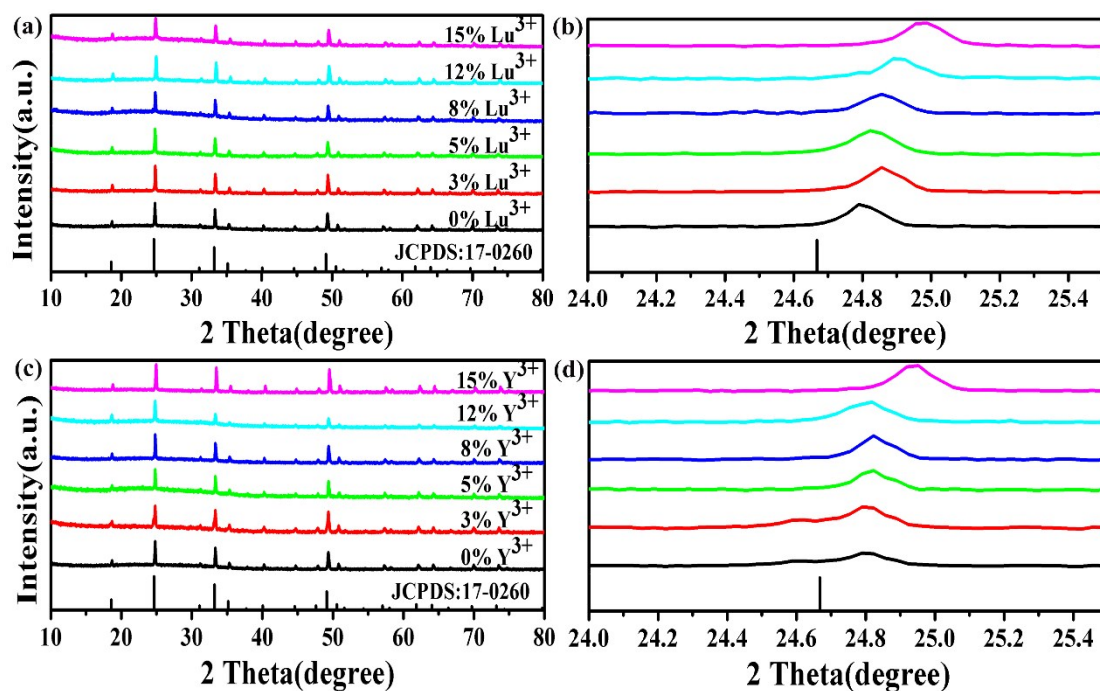

Fig. S1 XRD patterns of  $(\text{Gd}_{1-x}\text{Lu}_x)\text{VO}_4:2\%\text{Er}^{3+}/15\%\text{Yb}^{3+}$  and  $(\text{Gd}_{1-y}\text{Y}_y)\text{VO}_4:2\%\text{Er}^{3+}/15\%\text{Yb}^{3+}$  ( $0 \leq x, y \leq 15$ ) samples in the range of (a), (c)  $10\text{-}80^\circ$ , (b), (d)  $24\text{-}25.5^\circ$ .

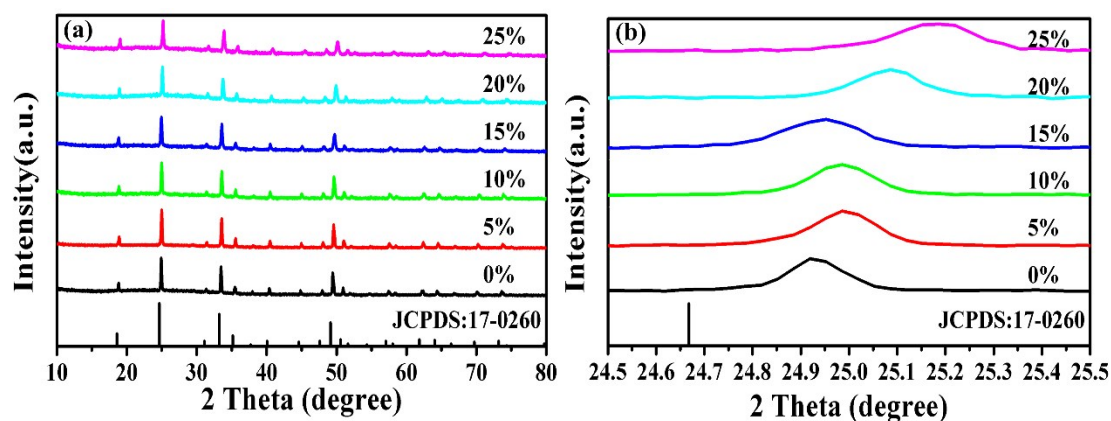

Fig. S2 XRD patterns of  $\text{Gd}(\text{V}_{1-x}\text{P}_x\text{O}_4):2\%\text{Er}^{3+}/15\%\text{Yb}^{3+}$  ( $0 \leq x \leq 25$ ) samples in the range of (a)  $10\text{-}80^\circ$ , (b)  $24.5\text{-}25.5^\circ$ .
